# Supplementary material
Source: MDPI journal article supplement (https://www.mdpi.com/2073-4395/10/10/1604)
Supplement: s1 [file s1]

## Supplementary Materials

**Table S1.** Days to germination and flowering expressed as means  $\pm$  standard deviations of the replicates (n=3) for each genotype. For the days to first flower, “#” means that at least one of the replicates did not flower and “-” means none of the replicates reach flowering.

| Genotype    | Days to germination | Days to first flower |                  |
|-------------|---------------------|----------------------|------------------|
|             |                     | Control              | Stress           |
| Bambey21    | 4.33 $\pm$ 0.82     | 58.33 $\pm$ 1.53     | 54.33 $\pm$ 0.58 |
| C11         | 4.33 $\pm$ 0.82     | 60.50 $\pm$ 6.36     | #                |
| C15         | 6.33 $\pm$ 1.03     | 59.00 $\pm$ 3.46     | #                |
| C18         | 5.00 $\pm$ 0.00     | 60.67 $\pm$ 1.15     | 58.00 $\pm$ 3.61 |
| C19         | 4.83 $\pm$ 0.41     | 60.00 $\pm$ 3.00     | 55.00 $\pm$ 1.73 |
| C20         | 5.33 $\pm$ 0.82     | 56.67 $\pm$ 1.15     | 56.67 $\pm$ 3.51 |
| C21         | 5.83 $\pm$ 1.33     | 56.67 $\pm$ 1.15     | 58.00 $\pm$ 4.00 |
| C22         | 4.67 $\pm$ 0.82     | 58.00 $\pm$ 1.00     | 58.67 $\pm$ 0.58 |
| C23         | 4.67 $\pm$ 0.82     | 55.33 $\pm$ 2.31     | 58.00 $\pm$ 5.29 |
| C24         | 5.17 $\pm$ 0.41     | 56.67 $\pm$ 1.15     | 55.67 $\pm$ 4.04 |
| C29         | 4.67 $\pm$ 0.52     | 56.67 $\pm$ 0.58     | 55.33 $\pm$ 2.08 |
| C3          | 4.17 $\pm$ 0.98     | 60.67 $\pm$ 0.58     | 59.33 $\pm$ 1.53 |
| C31         | 4.67 $\pm$ 0.52     | 53.00 $\pm$ 1.00     | 51.67 $\pm$ 2.31 |
| C39         | 5.00 $\pm$ 1.41     | 55.00 $\pm$ 1.00     | 58.33 $\pm$ 2.08 |
| C41         | 4.83 $\pm$ 0.41     | #                    | #                |
| C43         | 4.67 $\pm$ 1.03     | 59.33 $\pm$ 2.31     | 55.33 $\pm$ 0.58 |
| C45         | 6.00 $\pm$ 1.55     | 56.00 $\pm$ 0.00     | 56.67 $\pm$ 1.15 |
| C47         | 5.00 $\pm$ 0.00     | 63.00 $\pm$ 1.73     | 61.00 $\pm$ 3.00 |
| C49         | 4.83 $\pm$ 0.41     | 58.67 $\pm$ 3.06     | 60.67 $\pm$ 4.16 |
| C5          | 3.33 $\pm$ 1.03     | 61.33 $\pm$ 1.15     | 61.00 $\pm$ 1.73 |
| C51         | 5.00 $\pm$ 0.00     | 53.33 $\pm$ 0.58     | 53.00 $\pm$ 0.00 |
| C52         | 5.50 $\pm$ 0.84     | 62.67 $\pm$ 4.97     | #                |
| C53         | 4.67 $\pm$ 0.82     | 60.00 $\pm$ 4.00     | 63.67 $\pm$ 1.15 |
| C56         | 4.00 $\pm$ 1.10     | 55.67 $\pm$ 3.79     | 58.00 $\pm$ 4.36 |
| C57         | 4.83 $\pm$ 0.98     | 59.00 $\pm$ 4.36     | 60.33 $\pm$ 3.51 |
| C58         | 4.67 $\pm$ 1.86     | 55.67 $\pm$ 4.93     | 54.67 $\pm$ 2.89 |
| C59         | 5.33 $\pm$ 0.52     | #                    | -                |
| C8          | 4.50 $\pm$ 0.84     | 56.67 $\pm$ 5.77     | 59.67 $\pm$ 1.53 |
| IT93K-503-1 | 6.83 $\pm$ 0.75     | -                    | -                |

**Table S2.** Percentage of immature (I), mature (M) and no grain (N) pods for each genotype under control and drought conditions.

| Genotype    | 30 cm pipes |     |     | 90 cm pipes |     |      |
|-------------|-------------|-----|-----|-------------|-----|------|
|             | I           | M   | N   | I           | M   | N    |
| Bambey21    | 18%         | 41% | 41% | 64%         | 9%  | 27%  |
| C11         | 41%         | 32% | 27% | 27%         | 27% | 45%  |
| C15         | 87%         | 0%  | 13% | 0%          | 0%  | 100% |
| C18         | 38%         | 41% | 21% | 40%         | 20% | 40%  |
| C19         | 45%         | 5%  | 50% | 47%         | 29% | 24%  |
| C20         | 50%         | 31% | 19% | 58%         | 17% | 25%  |
| C21         | 45%         | 40% | 15% | 50%         | 14% | 36%  |
| C22         | 41%         | 30% | 30% | 53%         | 0%  | 47%  |
| C23         | 20%         | 70% | 10% | 50%         | 0%  | 50%  |
| C24         | 43%         | 22% | 35% | 35%         | 0%  | 65%  |
| C29         | 72%         | 11% | 17% | 47%         | 12% | 41%  |
| C3          | 58%         | 0%  | 42% | 100%        | 0%  | 0%   |
| C31         | 45%         | 40% | 15% | 38%         | 62% | 0%   |
| C39         | 12%         | 65% | 24% | 45%         | 18% | 36%  |
| C41         | 35%         | 6%  | 59% | -           | -   | -    |
| C43         | 75%         | 8%  | 17% | 80%         | 0%  | 20%  |
| C45         | 36%         | 57% | 7%  | 70%         | 20% | 10%  |
| C47         | 60%         | 0%  | 40% | 57%         | 0%  | 43%  |
| C49         | 57%         | 10% | 33% | 56%         | 0%  | 44%  |
| C5          | 52%         | 16% | 32% | 26%         | 0%  | 74%  |
| C51         | 58%         | 40% | 3%  | 17%         | 39% | 43%  |
| C52         | 47%         | 13% | 40% | 33%         | 0%  | 67%  |
| C53         | 44%         | 19% | 38% | 0%          | 0%  | 100% |
| C56         | 19%         | 58% | 23% | 44%         | 25% | 31%  |
| C57         | 21%         | 38% | 41% | 47%         | 6%  | 47%  |
| C58         | 31%         | 69% | 0%  | 53%         | 24% | 24%  |
| C59         | 8%          | 0%  | 92% | -           | -   | -    |
| C8          | 27%         | 12% | 62% | 57%         | 29% | 14%  |
| IT93K-503-1 | -           | -   | -   | -           | -   | -    |

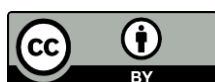

© 2020 by the authors. Submitted for possible open access publication under the terms and conditions of the Creative Commons Attribution (CC BY) license (<http://creativecommons.org/licenses/by/4.0/>).
